# Supplementary material
Source: PubMed Central journal article supplement (PMC6925992)
Supplement: pnas.1908724116.sapp.pdf [file pnas.1908724116.sapp.pdf]

1 **Supporting Information (SI)**

2

3 **Fig. S1**

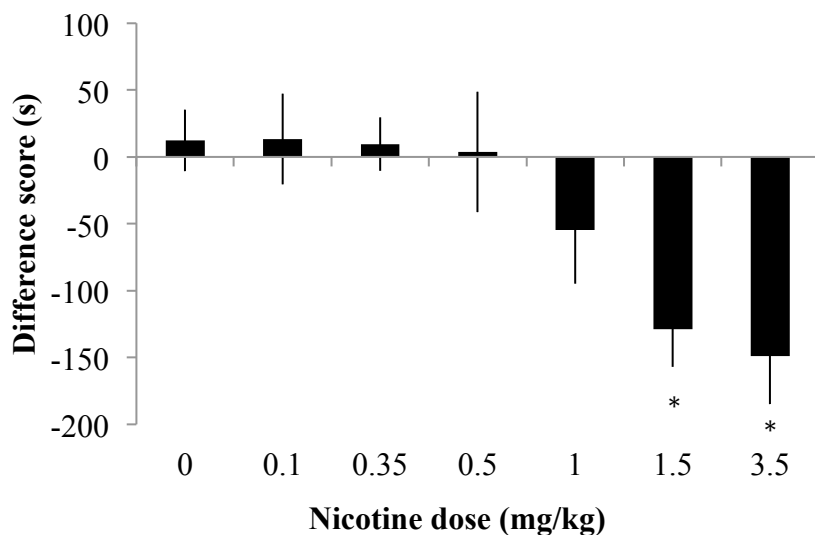

4

5 **Fig. S1.** The dose-response curve for acute nicotine in nondependent mice in our place  
6 conditioning paradigm. Only higher doses of acute nicotine (1.5 and 3.5 mg/kg) elicited a  
7 significant conditioned place aversion in groups of mice. Lower doses did not elicit a  
8 significant rewarding or aversive response. Data and error bars represent mean  $\pm$  S.E.M. ( $*P$   
9  $< 0.05$ ).

10

11

12

13

14

1 **Fig. S2**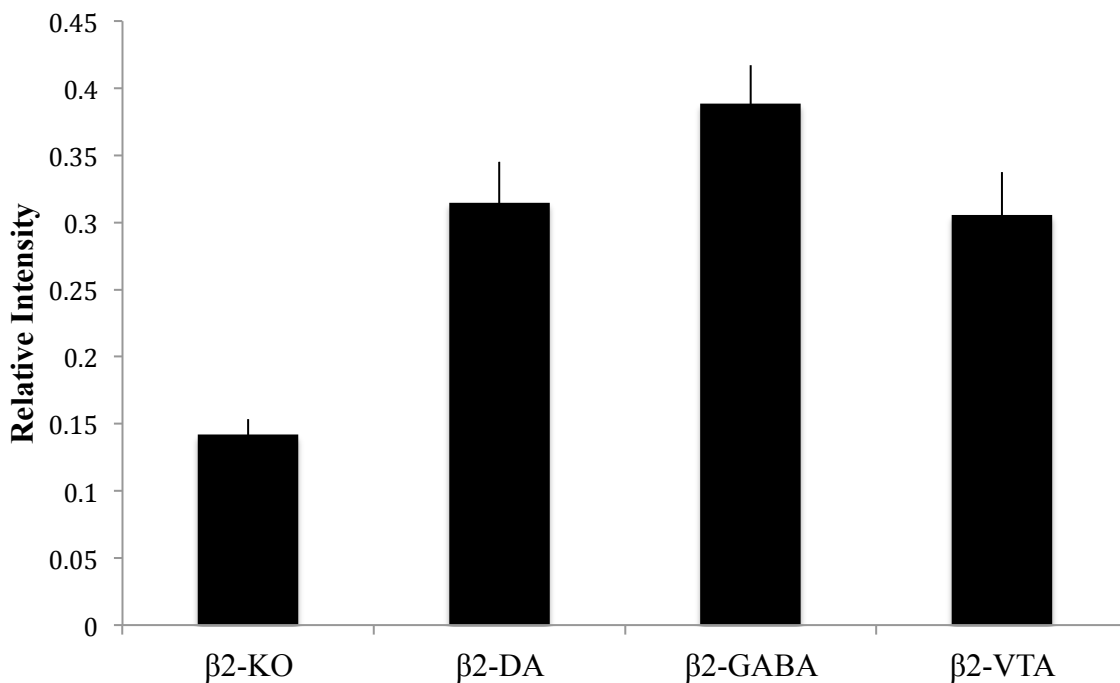2  
3

4 **Fig. S2.** [125I]-Epibatidine autoradiography binding quantification of lentiviral restoration  
5 of  $\beta 2^*$ -nAChRs in the VTA. Data show the mean inverse luminosity+SEM relative to  $\beta 2$ -  
6 KO ( $n=2$ ),  $\beta 2$ -DA ( $n=2$ ),  $\beta 2$ -GABA ( $n=6$ ) and  $\beta 2$ -VTA ( $n=5$ ), after subtraction of internal  
7 background and nicotine-resistant non-specific binding. Some subsisting background  
8 remains in  $\beta 2$ -KO, probably due to the proximity of fasciculus retroflexus and  
9 interpeduncular nucleus which show high levels of [125I]-Epibatidine binding sites  
10 corresponding to non-  $\beta 2$  heteromeric nicotinic receptors (1, 2, 3).

11

12

13

1 **Fig. S3**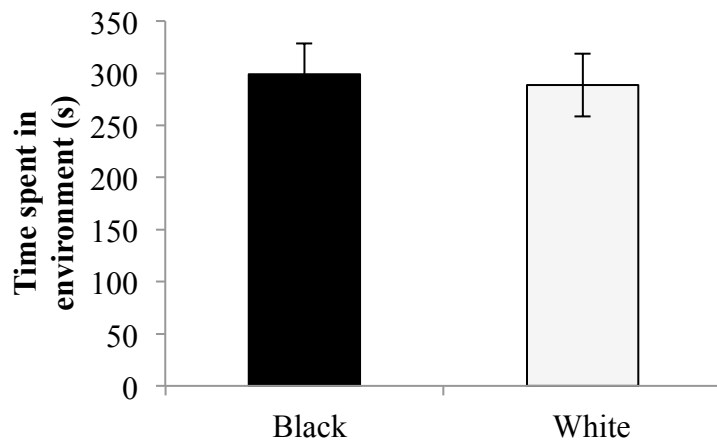

2

3 **Fig. S3.** Control groups of mice injected with saline in both the black and white  
4 environments showed no significant preference for either environment.

5

6

7

8

9

10

11

12

13

1 **Fig. S4.**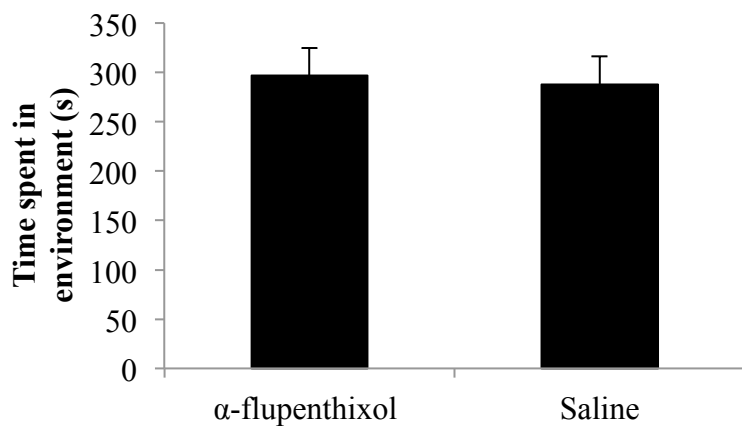

2

3 **Fig. S4.** α-flupenthixol has no motivational effects. A control group of C57Bl/6 mice given  
4 α-flupenthixol (0.8 mg/kg) in one environment and saline in the other showed no  
5 motivational preference for either environment. These results suggest that α-flupenthixol  
6 produces no motivational effects at the dose used in this study.

7

8

9

10

11

12

13

1 **Fig. S5.**

2

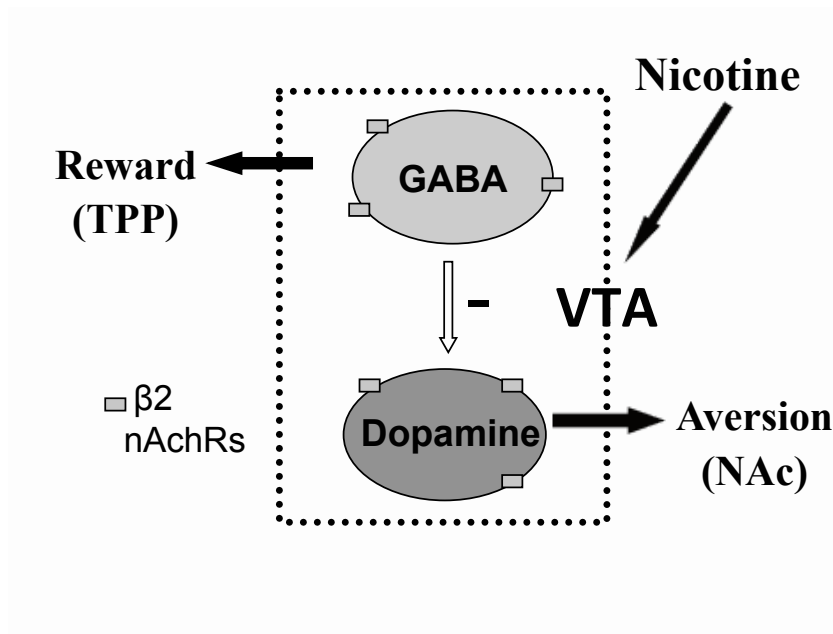

3

4 **Fig. S5.** Schematic summary of the VTA response to acute nicotine. Acute nicotine in  
 5 nondependent mice acts on the ventral tegmental area (VTA) by activating  $\beta 2$  nAChRs  
 6 located on the GABA and dopamine neurons. The acute nicotine reward signal is mediated  
 7 by the tegmental pedunclopontine nucleus (TPP; 4), and the aversive signal by a specific  
 8 pattern of dopaminergic activity at D1 receptors (5) to the nucleus accumbens (NAc). We  
 9 show here that  $\beta 2^*$  nAChRs located on GABA neurons are necessary and sufficient to  
 10 produce a CPP, and that the  $\beta 2^*$  nAChRs located on dopamine neurons are necessary and  
 11 sufficient to produce CPA for acute nicotine.

12

13

## References

1. Harrington L, Viñals X, Herrera-Solís A, Flores A, Morel C, Tolu S, Faure P, Maldonado R, Maskos U, Robledo P (2016) Role of  $\beta 4^*$  Nicotinic Acetylcholine Receptors in the Habenulo-Interpeduncular Pathway in Nicotine Reinforcement in Mice. *Neuropsychopharmacology* 41(7):1790-802.
2. Maskos U, et al (2005) Nicotine reinforcement and cognition restored by targeted expression of nicotinic receptors. *Nature* 436:103-7.
3. Tolu S, et al. (2013) Co-activation of VTA DA and GABA neurons mediates nicotine reinforcement. *Mol Psychiatry* doi:10.1038/mp.2012.83.
4. Laviolette SR, Alexson TO, van der Kooy D (2002) Lesions of the tegmental pedunculo-pontine nucleus block the rewarding effects and reveal the aversive effects of nicotine in the ventral tegmental area. *J Neurosci* 22:8653-60.
5. Grieder TE, George O, Tan H, George SR, Le Foll B, Laviolette SR, van der Kooy D (2012) Phasic D1 and tonic D2 dopamine receptor signaling double dissociate the motivational effects of acute nicotine and chronic nicotine withdrawal. *Proc Nat Acad Sci USA* 109:3101-6.
